1 **TITLE**

2

3 A chemically-defined growth medium to support *Lactobacillus* – *Acetobacter* community analysis

4

5

6 **AUTHORS**

7

8 Kevin Aumiller\*<sup>1,2</sup>, Eric Stevens\*<sup>3</sup>, Robert Scheffler\*<sup>1,2</sup>, Zehra Tüzün Güvener\*<sup>4</sup>, Emily Tung<sup>4</sup>, Anna B.  
9 Grimaldo<sup>5</sup>, Hans K. Carlson<sup>6</sup>, Adam M. Deutschbauer<sup>5,6</sup>, Michiko E. Taga<sup>5</sup>, Maria L. Marco<sup>3,7</sup>, William  
10 B. Ludington<sup>1,2@</sup>

11

12 \* contributed equally

13 @ to whom correspondence should be directed: ludington@carnegiescience.edu

14

15

16 **AFFILIATIONS**

17

18 1. Carnegie Institution of Washington, Department of Embryology, Baltimore, MD 21218

19 2. Johns Hopkins University, Department of Biology, Baltimore, MD 21218

20 3. University of California, Davis, Microbiology Graduate Group, College of Biology

21 4. University of California, Berkeley, Molecular and Cell Biology Department, 94720

22 5. University of California, Berkeley, Department of Plant and Microbiology, 94720

23 6. Lawrence Berkeley National Laboratory, Department of Environmental Genomics and Systems  
24 Biology, Berkeley, CA 94720

25 7. University of California, Davis, Department of Food Science and Technology, Davis, CA 95616

26

27

28 **KEYWORDS**

29

30 *Lactobacillus* | *Acetobacter* | Chemically-defined growth medium | CDM

31

32

33

34 **ABSTRACT**

35

36 *Lactobacilli* and *acetobacters* are commercially important bacteria that often form communities in natural  
37 fermentations, including food preparations, spoilage, and in the digestive tract of *Drosophila*  
38 *melanogaster* fruit flies. Communities of these bacteria are widespread and prolific, despite numerous  
39 strain-specific auxotrophies, suggesting they have evolved nutrient interdependencies that regulate their  
40 growths. The use of a chemically-defined medium (CDM) supporting the growth of both groups of  
41 bacteria would greatly facilitate identification of the precise metabolic interactions between these two  
42 groups of bacteria. While numerous such media have been developed that support specific strains of  
43 *lactobacilli* and *acetobacters*, there has not been a medium formulated to support both genera. We  
44 developed such a medium, based on a previous *Lactobacillus* CDM, by modifying the nutrient  
45 abundances to improve growth of both groups of bacteria. We further simplified the medium by  
46 substituting casamino acids for individual amino acids and the standard Wolfe's vitamins and mineral  
47 stocks for individual vitamins and minerals, resulting in a reduction from 40 to 8 stock solutions. The new  
48 CDM and variations of it support robust growth of *lactobacilli* and *acetobacters*. We provide the  
49 composition and an example of its use to measure nutritional interactions.

## 50 INTRODUCTION

51  
52 Lactic Acid Bacteria (LAB) and Acetic Acid Bacteria (AAB) coexist in nature in a wide variety  
53 of environments (Reese, 1938). These include food fermentations such as wine (Reese, 1938), beer  
54 (Dysvik et al., 2020), kefir (da Cruz Pedrozo Miguel et al., 2010; Gulitz et al., 2011), sauerkraut (Wang  
55 and Shao, 2018), kimchi (Wang et al., 2016), bread (Li et al., 2021), and cacao beans (Ho et al., 2018).  
56 They also have been found together in agricultural feed, such as silage (Guan et al., 2018). LAB and AAB  
57 can coexist as well in mammalian and insect gastrointestinal tracts where they have probiotic benefits  
58 (Viladomiu et al., 2013), including within the intestine of the genetic model animal, *Drosophila*  
59 *melanogaster*, where lactobacilli and acetobacters are the core types of LAB and AAB respectively  
60 (Wong et al., 2011). We note that due to the recent reclassifications within the former *Lactobacillus* genus  
61 (Zheng et al., 2020), we refer to the LABs used in this study by their new formal scientific names,  
62 *Lactiplanibacillus plantarum* (*Lp. plantarum*) and *Levilactobacillus brevis* (*Ll. brevis*) or collectively by  
63 their common name, lactobacillus (plural lactobacilli).  
64

65 Why LAB and AAB co-occur so prevalently is the subject of ongoing investigations. A  
66 synergistic metabolism between lactobacilli and acetobacters has been demonstrated based on sharing of  
67 organic short chain fatty acids (SCFAs), including lactic acid and acetic acid. These compounds are  
68 generally known to mutually promote growth through cross feeding, such that lactate stimulates  
69 acetobacter growth and acetate stimulates lactobacilli (Consuegra et al., 2020; Henriques et al., 2020).  
70 There is biomedical relevance of SCFA, including acetate, which are important in human and insect  
71 health because their production by the gut microbiome plays a key role in gut epithelial cell metabolism  
72 and immune homeostasis (Kim et al., 2018; Rivera-Chávez et al., 2016), potentially underlying the role of  
73 LABs as probiotics (Viladomiu et al., 2013). Furthermore, in the mammalian colonic crypts, microbial  
74 assemblages include *Lactobacillus* and other Lactobacillales, such as *Streptococcus* and  
75 Alphaproteobacteria besides *Acetobacter*, including *Sphingomonas* and *Paracoccus* (Pédrón et al., 2012;  
76 Saffarian et al., 2019), suggesting there may be a broader phylogenetic pattern of co-existence for these  
77 groups, and understanding these relationships in *in vitro* communities could provide insights into their  
78 roles in more complex environments with multiple trophic levels such as digestive tract. For instance,  
79 cross-feeding may extend beyond SCFAs to other metabolites, including B-vitamins, such as folate and  
80 cyanocobalamin, which also impact host health (Degnan et al., 2014; Sannino et al., 2018), and cross-fed  
81 nutrients could influence secondary metabolite production (San Roman and Wagner, 2018).  
82

83 Determining the nutrient requirements for organismal growth (Elli et al., 2000) as well as the  
84 metabolites produced (Ponomarova et al., 2017) during fermentation is greatly improved with a defined  
85 composition of the growth medium. Chemically-defined growth media have been developed to support  
86 lactobacilli growth (Chervaux et al., 2000; Elli et al., 2000; Grobber et al., 1995; Petry et al., 2000;  
87 Ricciardi et al., 2015; Saguir and de Nadra, 2007; Savijoki et al., 2006; Wegkamp et al., 2007), yet strain-  
88 specific differences in growth requirements between different lactobacilli are widely reported, particularly  
89 carbon, amino acid, vitamin, and mineral requirements, (Hayek and Ibrahim, 2013). Construction of a rich  
90 CDM could overcome some of these limitations. Furthermore, no media have been developed with the  
91 express purpose of supporting lactobacilli-*Acetobacter* communities. To better understand the nutritional  
92 dependencies within lactobacillus-*Acetobacter* communities, we developed a rich, chemically-defined  
93 medium (CDM) capable of independently supporting growth of both lactobacillus and *Acetobacters* from  
94 the fruit fly gut microbiome and other sources in high throughput. We based this medium on the  
95 formulation of Savijoki et al 2006. Our medium may be modified to optimize the growth of either  
96 lactobacilli or acetobacters to a density of  $\sim 10^9$  cells/mL ( $OD > 1$ ) or to support co-cultures. In this short  
97 report, we provide the chemical composition of the medium, some guides on its preparation, an approach  
98 to circumvent strain-specific auxotrophies, and some known issues that can result from chemical  
99 impurities. We focus our results on the lactobacilli and acetobacters from the *Drosophila* gut microbiome.  
100

## 101 RESULTS AND DISCUSSION

102

### 103 Formulation of the CDM for lactobacilli growth

104

105 With a goal of defining a CDM that supports growth of the lactobacilli and *Acetobacters* isolated from the fruit fly gut (Table S1), we first tested a previous chemically-defined medium that was developed for lactobacillus species (Savijoki et al., 2006). This medium contains ? glucose? All amino acids nucleotides? (*it would be helpful to understand more precisely what was included*) However, that medium supported only limited growth of our strains (OD<sub>600</sub> of X) and a precipitate formed upon 4 C? room temperature? storage. To prevent precipitation, we modified the medium by reducing the concentration of amino acids from X to X ug/ml. This modified medium supported growth of *Lp. plantarum* LFM1, a *D. melanogaster* isolate, to an OD<sub>600</sub> of only approximately 0.2 (Table S2), corresponding to ~10<sup>8</sup> cells/mL. This low value is ~10 fold lower density than reported for the *Lp. plantarum* strain analyzed in the previous study (Savijoki et al., 2006). As strain-specific differences in media preferences are widely reported in lactobacilli (Hayek and Ibrahim, 2013), we further refined the composition by individually adding amino acids, vitamins and nucleotides at 10-fold higher concentrations into the original CDM (Table S3). Higher amounts of tyrosine and cysteine resulted in media precipitation, causing a higher OD<sub>595</sub> reading, which would interfere with high throughput growth measurements. Improved growth yield with excess alanine and tryptophan was reproducible, thus we increased these concentrations in the CDM to 14 mM and 1.4 mM, respectively (Table 1). We also experimented with increasing or decreasing the total amino acids, vitamins, and nucleic acids (Table S4), which showed we could double these components to increase *Lp. plantarum* growth without substantially affecting other lactobacilli and acetobacters.

142 We next simplified the medium to reduce the total number of stock solutions. We first replaced the vitamins and minerals with Wolfe's vitamins and Wolfe's minerals stocks, which did not noticeably affect growth (not shown). We then replaced the individual amino acids with casamino acids, which are a mixture of purified amino acids derived from peptidase treatment of casein, having a

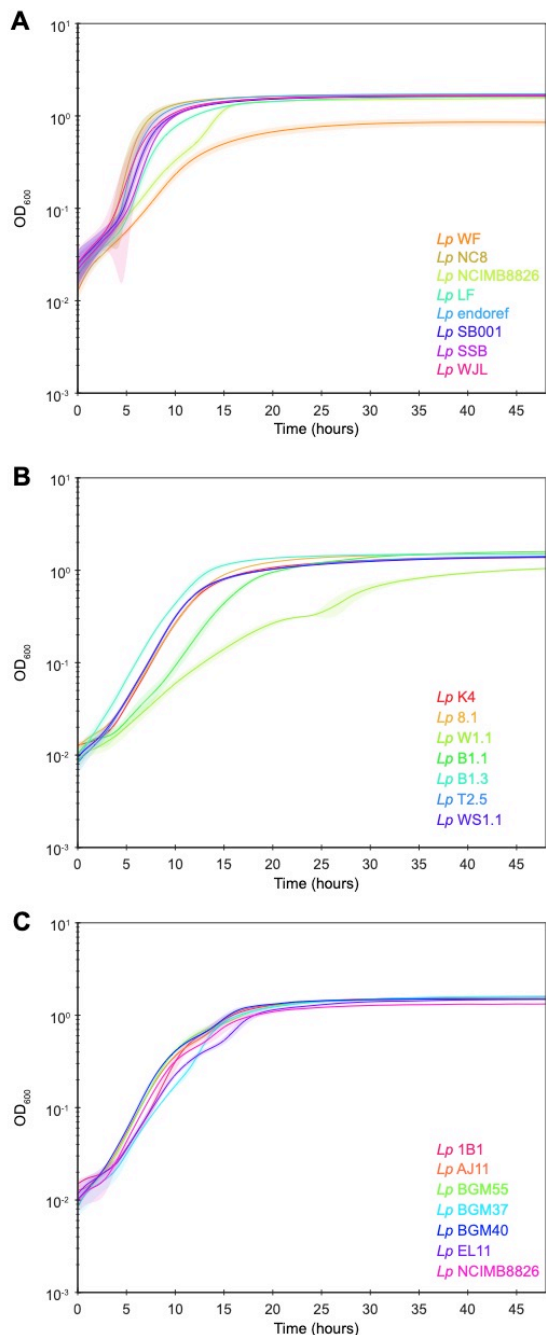

**Figure 1. *Lp. plantarum* growth in CDM\_L.** Most strains grew to OD > 1.5, while *LpWF* grew to OD 0.8. Cultures were inoculated in 96 well microplates from CDM passaged cells at a starting OD of 0.05. N=12 replicates per sample. Solid line is cubic spline-smoothed mean. Shading is s.e.m. Samples in B & C were grown in a separate lab from A, with a separate batches of media and a different plate reader. In panel A, cells were passaged through CDM three times before inoculation for growth measurements. In B and C, cells were inoculated from MRS. Note faster initial growth in A.

151 representative abundance of each individual amino  
152 acid. This variant of the medium, named CDM\_L still  
153 required additional cysteine (12 mM final  
154 concentration) and tryptophan (2.5 mM final  
155 concentration) (Figure S1; Table 2) but supported  
156 rapid growth of a variety of *Lp. plantarum* strains  
157 from different sources (Table S1) to an OD > 1,  
158 corresponding to  $\sim 10^9$  cells/mL (Figure 1),  
159

160 We note several technical issues that arose when  
161 constructing and testing the various CDMs. First,  
162 inocula from nutrient rich agar plates such as MRS  
163 agar do not grow well in CDM, but conditioning them  
164 by passing through a mixture of 25:75 MRS:CDM  
165 before 100% CDM greatly improved the number of  
166 strains that grew. For many strains, the most robust  
167 growth resulted after three passages in CDM.  
168

169 Second, we noticed that when different commercial  
170 sources of iron and cobalt were used, a precipitate  
171 sometimes formed after 48 hours at room  
172 temperature. Re-filtering the media to remove the precipitate did not inhibit *Lp. plantarum* growth,  
173 suggesting that lower metal concentrations may be used at least for some strains. As noted earlier, amino  
174 acid precipitation was also an issue, which we were able to resolve by reducing the total amount of amino  
175 acids (by x-fold) while increasing select ones through the use of casamino acids, cysteine, and tryptophan.  
176

177

### 178 **Modification of the CDM for *Acetobacter* growth**

179

180 Next, we incubated several strains of *Acetobacter* in CDM\_L. *A. pasteurianus* and *A. tropicalis*  
181 exhibited extremely limited growth (Table S2). In an attempt to improve growth, we repeated the 10-fold  
182 additions experiment used test for improved lactobacilli growth, with ascorbate providing the only growth  
183 improvement (Table S3). Because ascorbate caused discoloration of the media after 48 h at room  
184 temperature, we only use it optionally. Through a series of trials, we also added lactate, substituted  
185 potassium acetate for ammonium acetate, and reduced the amino acid concentrations (by 2.5-fold to  
186 formulate a new version of the CDM named CDM\_A (Table 3), which supported an OD<sub>595</sub> of  $\sim 1.0$  ( $\sim 10^9$   
187 cells/mL) for the three *Acetobacter* strains tested (Figure 2). We note that it was critical to supply  
188 adequate aeration to *Acetobacter* by shaking and poking a hole in the sealing film over the plate.  
189 Increased shaking speed increased the clumping of the cultures, which appears as increased variance in  
190 the growth curves (Figure 2). Reducing the shaking speed reduced clumping but also reduced the growth  
191 rate.  
192

193

### 193 **An *Ll. brevis* strain shows cross-feeding with an *Acetobacter***

194

195 Some preliminary experiments with dropouts of individual nutrients suggested that *Ll. brevis* strain LF,  
196 which we isolated from laboratory *D. melanogaster*, had several auxotrophies. This strain grew in Man  
197 Rogosa Sharpe (MRS) rich medium but was unable to grow in the complete CDM\_L, suggesting  
198 metabolic deficiencies (Figure 3A). Growth was restored with the addition of 2.5% v/v MRS to the  
199 CDM\_L (CDM\_L+MRS\_2.5 (final OD<sub>600</sub> = 0.6). One of the auxotrophies appeared to be for folate. We  
200 then made CDM\_L+MRS\_2.5 lacking folate (CDM\_L+MRS\_2.5-folate). *L. brevis* LF was unable to  
201 grow in CDM\_L+MRS\_2.5-folate, consistent with a folate auxotrophy (Figure 3A).

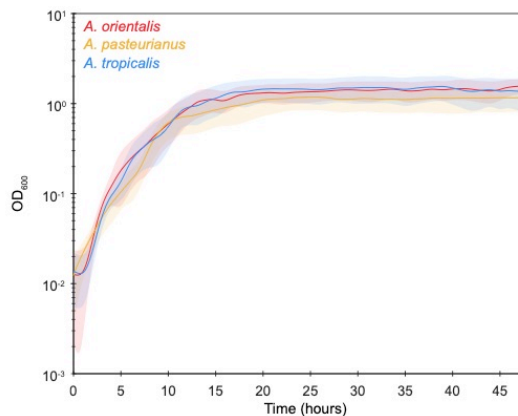

**Figure 2. *Acetobacter* strain growth in CDM\_A.** *A. orientalis*, *A. pasteurianus*, and *A. tropicalis* grow to O.D. >1.0. Cultures were inoculated in 96-well plates from CDM-passaged cells at a starting O.D. of 0.05. N= 12 replicates per sample. Solid line is cubic spline-smoothed mean. Shading is s.e.m.

202  
203  
204  
205  
206  
207  
208  
209  
210  
211  
212  
213  
214  
215  
216  
217  
218  
219  
220  
221  
222  
223  
224  
225  
  
226  
227

Acetobacters are known B-vitamin producers, with complete folate metabolism (Bernhardt et al., 2019; Sannino et al., 2018). Coculture with *A. pasteurianus* increased *Ll. brevis* LF growth in CDM\_L as did a 50:50 mix of CDM\_L+MRS\_2.5-folate with filter-sterilized spent CDM\_L+MRS\_2.5-folate from *A. pasteurianus* growth (Figure 3B), indicating that *A. pasteurianus* produces metabolites (likely including folate) that compensate for the *Ll. brevis* auxotrophies. While the overall densities of cells are quite low, this example shows how the base CDM can be used to explore community metabolism in lactobacillus-*Acetobacter* cocultures, even when the medium cannot support the individual strains.

## CONCLUSIONS

The CDM formulated here enables investigation of lactobacillus-*Acetobacter* community metabolism and it may provide a starting point for investigation of more diverse LAB and AAB communities, which are often observed together in nature.

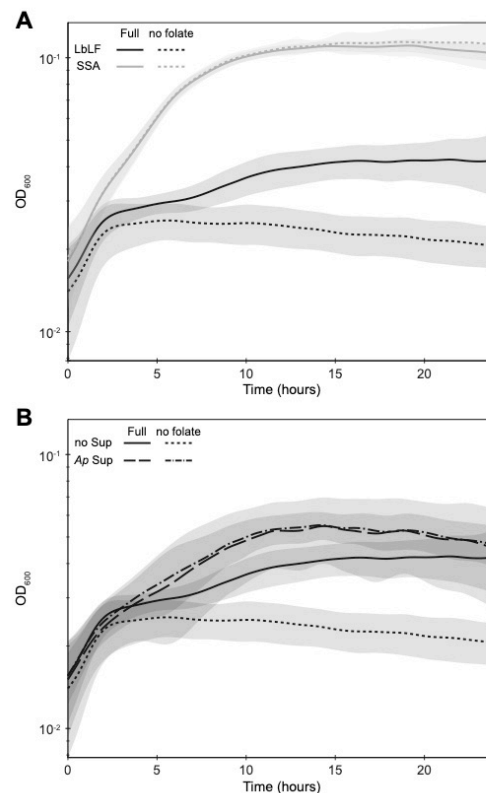

**Figure 3. Lactobacillus-Acetobacter coculture in spent CDM\_L+MRS\_2.5 that lacks folate.** (A) *Levilactobacillus brevis* LF grows in CDM\_L supplemented with 2.5% MRS but not when folate is excluded. (B) *Acetobacter pasteurianus*-conditioned media restores *Ll. brevis* LF growth in CDM lacking folate. All samples grown in 96-well plates. N=12 replicates per sample. Solid line is cubic spline-smoothed mean. Shading is s.e.m.

## 228 MATERIALS AND METHODS

229

### 230 Chemicals

231

232 A list of chemicals used in CDM are provided in Table S5.

233

### 234 Media preparation

235

236 Stock solutions were individually prepared in ultra-pure water or in appropriate solvents. pH adjustments  
237 were made as indicated in Table 1. All stock solutions were passed through 0.22  $\mu\text{m}$  filter and kept in  
238 dark at 4 °C except nucleotides, which were stored at -20 °C.  $\text{FeSO}_4 \cdot 7\text{H}_2\text{O}$  was freshly prepared. Medium  
239 was initially made with 30 % less water to allow customized additions. Final pH of CDM was adjusted to  
240 6.5 and the medium was passed through a 0.22  $\mu\text{m}$  filter. CDM was stored at 4 °C and used within 2 days.

241

242 To make a carbon-free CDM, the following components were combined in the following order in a final  
243 volume of 17.5 ml: 8.375 ml ultra-pure water, 2.5 ml MOPS buffer, 0.25 ml  $\text{K}_2\text{HPO}_4$ , 0.25 ml NaCl, 0.25  
244 ml  $\text{NH}_4\text{Cl}$ , 0.5 ml  $\text{K}_2\text{SO}_4$ , 0.625 ml L-Alanine, 0.125 ml L-Arginine, 0.125 ml Glycine, 0.125 ml L-  
245 Lysine, 0.5 ml L-Proline, 0.125 ml L-Histidine, 0.125 ml L-Serine, 0.125 ml L-Threonine, 0.125 ml L-  
246 Aspartic acid, 20  $\mu\text{L}$  of 10 N NaOH for pH correction, 0.125 ml L-Asparagine, 10  $\mu\text{L}$  of 10 N NaOH for  
247 pH correction, 0.125 ml L-Tyrosine, 0.125 ml L-Cysteine-HCl, 0.125 ml L-Valine, 0.125 ml L-Glutamic  
248 acid, 0.125 ml L-Tryptophane, 0.125 ml L-Phenylalanine, 0.125 ml L-Glutamine, 0.125 ml L-Leucine,  
249 0.125 ml L-Isoleucine, 0.125 ml L-Methionine, 0.125 ml Ca-D-(+)-pantothenate, 0.125 ml Lipoic acid,  
250 0.125 ml Nicotinic acid, 0.125 ml para-Aminobenzoic acid, 0.125 ml Pyridoxine-HCl, 0.125 ml  
251 Thiamine-HCl, 0.125 ml Biotin, 0.125 ml Ascorbic acid, 0.125 ml Folic acid, 0.125 ml Guanine, 0.125 ml  
252 Uracil, 0.125 ml Xanthine, 0.125 ml Adenine, 0.25 ml  $\text{MgCl}_2 \cdot 6\text{H}_2\text{O}$ , 0.25 ml  $\text{MnCl}_2 \cdot 4\text{H}_2\text{O}$ , 0.25 ml  
253  $\text{FeSO}_4 \cdot 7\text{H}_2\text{O}$ .

254

255 Appropriate carbon sources were provided in CDM to grow specific isolates. A final concentration of 1 %  
256 glucose and 0.1 % acetate were added for the growth of *L. plantarum*. A final concentration of 1 %  
257 glucose, 0.5 % fructose and 0.1 % acetate was optimized for the growth of *L. brevis*. A final concentration  
258 of 1 % fructose was used for the growth of *Acetobacter pasteurianus*, and 1 % glucose was used for the  
259 growth of *A. tropicalis*.

260

### 261 Bacterial strains and growth

262

263 Bacterial strains used in this study are listed in Table S1. Strains were grown on MRS agar plates at 30 °C  
264 incubation for 1 to 2 days. Plate-grown cells were routinely generated from glycerol stocks and plates  
265 were used only once. At least 30 colonies [to reduce the odds of a mutant dominating the growth curve]  
266 were transferred into 3 ml CDM in a test tube and cultures were shaken at 30°C for 16 to 18 h. Turbidity  
267 was adjusted to  $\text{OD}_{600}$  of 0.5 and used to inoculate media for growth kinetics experiments. Time-course  
268 growth experiments were performed in 100  $\mu\text{L}$  CDM in 96-well microplates. After aliquoting 70  $\mu\text{L}$   
269 CDM into each well, indicated carbon sources from sterile stocks were added to appropriate wells and the  
270 medium was inoculated with 10  $\mu\text{L}$  culture for a final  $\text{OD}_{600}$  of 0.05. Plates were sealed with a Breatheasy  
271 film. Microplates were incubated in a temperature-controlled plate reader with shaking.  $\text{OD}_{595}$   
272 measurements were taken every 15 minutes for 24 to 48 hours. M1000 (Tecan) and Magellan (Biotek)  
273 plate readers were used for experiments.  $\text{OD}_{595}$  measurements were background-subtracted using the  
274  $\text{OD}_{595}$  measurement of medium-only blank controls.

275

276 For acetobacter growth, maximal shaking was used, with a speed of 600 RPM at an orbital radius  
277 of 3 mm. To improve aeration further, we poked an off-center hole in the Breatheasy film over each well  
278 using a fine gauge needle.

279 **REFERENCES**

- 280 Bernhardt C, Zhu X, Schütz D, Fischer M, Bisping B. 2019. Cobalamin is produced by *Acetobacter*  
281 *pasteurianus* DSM 3509. *Appl Microbiol Biotechnol* 3875–3885. doi:10.1007/s00253-019-09704-3
- 282 Chervaux C, Ehrlich SD, Maguin E. 2000. Physiological Study of *Lactobacillus delbrueckii* subsp.  
283 *bulgaricus* Strains in a Novel Chemically Defined Medium. *Appl Environ Microbiol* 66:5306–5311.
- 284 Consuegra J, Grenier T, Akherraz H, Rahioui I, Gervais H, da Silva P, Leulier F. 2020. Metabolic  
285 cooperation among commensal bacteria supports *Drosophila* juvenile growth under nutritional  
286 stress. *ISCIENCE* 101232.
- 287 da Cruz Pedrozo Miguel MG, Gomes Cardoso P, de Assis Lago L, Freitas Schwan R. 2010. Diversity of  
288 bacteria present in milk kefir grains using culture-dependent and culture-independent methods. *Food*  
289 *Res Int* 43:1523–1528. doi:10.1016/j.foodres.2010.04.031
- 290 Degnan PH, Taga ME, Goodman AL. 2014. Vitamin B12 as a Modulator of Gut Microbial Ecology. *Cell*  
291 *Metab* 20:769–778.
- 292 Dysvik A, Leanti La Rosa S, De Rouck G, Rukke E-O, Westereng B, Wicklund T. 2020. Microbial  
293 Dynamics in Traditional and Modern Sour Beer. *Appl Environ Microbiol* 86:1–14.
- 294 Elli M, Zink R, Rytz A, Reniero R, Morelli L. 2000. Iron requirement of *Lactobacillus* spp. in completely  
295 chemically defined growth media. *J Appl Microbiol* 88:695–703.
- 296 Grobgen GJ, Sikkema J, Smith MR, de Bont JAM. 1995. Production of extracellular polysaccharides by  
297 *Lactobacillus delbrueckii* ssp. *bulgaricus* NCFB 2772 grown in a chemically defined medium. *J*  
298 *Appl Bacteriol* 79:103–107. doi:10.1111/j.1365-2672.1995.tb03130.x
- 299 Guan H, Yan Y, Li Xiaoling, Li Xiaomei, Shuai Y, Feng G, Ran Q, Cai Y, Li Y, Zhang X. 2018.  
300 Microbial communities and natural fermentation of corn silages prepared with farm bunker-silo in  
301 Southwest China. *Bioresour Technol* 265:282–290. doi:10.1016/j.biortech.2018.06.018
- 302 Gulitz A, Stadie J, Wenning M, Ehrmann MA, Vogel RF. 2011. The microbial diversity of water kefir.  
303 *Int J Food Microbiol* 151:284–288. doi:10.1016/j.ijfoodmicro.2011.09.016
- 304 Hayek SA, Ibrahim SA. 2013. Current limitations and challenges with lactic acid bacteria: a review. *Food*  
305 *Nutr Sci* 4:73–87.
- 306 Henriques SF, Dhakan DB, Serra L, Francisco AP, Carvalho-Santos Z, Baltazar C, Elias AP, Anjos M,  
307 Zhang T, Maddocks ODK, Ribeiro C. 2020. Metabolic cross-feeding in imbalanced diets allows gut  
308 microbes to improve reproduction and alter host behaviour. *Nat Commun* 11:4236.  
309 doi:10.1038/s41467-020-18049-9
- 310 Ho VTT, Fleet GH, Zhao J. 2018. Unravelling the contribution of lactic acid bacteria and acetic acid  
311 bacteria to cocoa fermentation using inoculated organisms. *Int J Food Microbiol* 279:43–56.
- 312 Kim G, Huang JH, McMullen JG, Newell PD, Douglas AE. 2018. Physiological responses of insects to  
313 microbial fermentation products: Insights from the interactions between *Drosophila* and acetic acid.  
314 *J Insect Physiol* 106:13–19. doi:10.1016/j.jinsphys.2017.05.005
- 315 Li H, Fu J, Hu S, Li Z, Qu J, Wu Z, Chen S. 2021. Comparison of the effects of acetic acid bacteria and  
316 lactic acid bacteria on the microbial diversity of and the functional pathways in dough as revealed  
317 by high-throughput metagenomics sequencing. *Int J Food Microbiol* 346:109168.  
318 doi:10.1016/j.ijfoodmicro.2021.109168
- 319 Pédrón T, Mulet C, Dauga C, Frangeul L, Chervaux C, Grompone G, Sansonetti PJ. 2012. A Crypt-  
320 Specific Core Microbiota Resides in the Mouse Colon. *MBio* 3:262–267.
- 321 Petry S, Furlan S, Crepeau MJ, Cerning J, Desmazeaud M. 2000. Factors affecting exocellular

- 322 polysaccharide production by *Lactobacillus delbrueckii* subsp *bulgaricus* grown in a chemically  
323 defined medium. *Appl Environ Microbiol* **66**:3427–3431.
- 324 Ponomarova O, Gabrielli N, Sévin DC, Mülleder M, Zirngibl K, Bulyha K, Andrejev S, Kafkia E, Typas  
325 A, Sauer U, Ralser M, Patil KR. 2017. Yeast Creates a Niche for Symbiotic Lactic Acid Bacteria  
326 through Nitrogen Overflow. *Cell Syst* **5**:345-357.e6.
- 327 Reese V. 1938. Some effects of association and competition on *Acetobacter*. *J Bacteriol* **36**:357–367.
- 328 Ricciardi A, Ianniello RG, Parente E, Zotta T. 2015. Modified chemically defined medium for enhanced  
329 respiratory growth of *Lactobacillus casei* and *Lactobacillus plantarum* groups. *J Appl Microbiol*  
330 **119**:776–785.
- 331 Rivera-Chávez F, Zhang LF, Faber F, Lopez CA, Byndloss MX, Olsan EE, Xu G, Velazquez EM,  
332 Lebrilla CB, Winter SE, Bäumlér AJ. 2016. Depletion of Butyrate-Producing Clostridia from the  
333 Gut Microbiota Drives an Aerobic Luminal Expansion of *Salmonella*. *CHOM* **19**:443–454.
- 334 Saffarian A, Mulet C, Regnault B, Amiot A, Tran-Van-Nhieu J, Ravel J, Sobhani I, Sansonetti PJ, Pédrón  
335 T. 2019. Crypt- and Mucosa-Associated Core Microbiotas in Humans and Their Alteration in Colon  
336 Cancer Patients. *MBio* **10**:G351-20.
- 337 Saguir FM, de Nadra MCM. 2007. Improvement of a Chemically Defined Medium for the Sustained  
338 Growth of *Lactobacillus plantarum*: Nutritional Requirements. *Curr Microbiol* **54**:414–418.
- 339 San Roman M, Wagner A. 2018. An enormous potential for niche construction through bacterial cross-  
340 feeding in a homogeneous environment. *PLoS Comput Biol* **14**:1–29.  
341 doi:10.1371/journal.pcbi.1006340
- 342 Sannino DR, Dobson AJ, Edwards K, Angert ER, Buchon N. 2018. The *Drosophila melanogaster* Gut  
343 Microbiota Provides Thiamine to Its Host. *MBio* **9**.
- 344 Savijoki K, Suokko A, Palva A, Varmanen P. 2006. New convenient defined media for [35S]methionine  
345 labelling and proteomic analyses of probiotic lactobacilli. *Lett Appl Microbiol* **42**:202–209.  
346 doi:10.1111/j.1472-765X.2005.01853.x
- 347 Viladomiu M, Hontecillas R, Yuan L, Lu P, Bassaganya-Riera J. 2013. Nutritional protective mechanisms  
348 against gut inflammation. *J Nutr Biochem*.
- 349 Wang Z, Shao Y. 2018. Effects of microbial diversity on nitrite concentration in pao cai, a naturally  
350 fermented cabbage product from China. *Food Microbiol* **72**:185–192. doi:10.1016/j.fm.2017.12.003
- 351 Wang ZM, Lu ZM, Shi JS, Xu ZH. 2016. Exploring flavour-producing core microbiota in multispecies  
352 solid-state fermentation of traditional Chinese vinegar. *Sci Rep* **6**:1–10. doi:10.1038/srep26818
- 353 Wegkamp A, van Oorschot W, de Vos WM, Smid EJ. 2007. Characterization of the role of para-  
354 aminobenzoic acid biosynthesis in folate production by *Lactococcus lactis*. *Appl Environ Microbiol*  
355 **73**:2673–2681.
- 356 Wong CNA, Ng P, Douglas AE. 2011. Low-diversity bacterial community in the gut of the fruitfly  
357 *Drosophila melanogaster*. *Environ Microbiol* **13**:1889–1900.
- 358 Zheng J, Wittouck S, Salvetti E, Franz CMAP, Harris HMB, Mattarelli P, O’toole PW, Pot B, Vandamme  
359 P, Walter J, Watanabe K, Wuyts S, Felis GE, Gänzle MG, Lebeer S. 2020. A taxonomic note on the  
360 genus *Lactobacillus*: Description of 23 novel genera, emended description of the genus  
361 *Lactobacillus* beijerinck 1901, and union of *Lactobacillaceae* and *Leuconostocaceae*. *Int J Syst Evol*  
362 *Microbiol* **70**:2782–2858. doi:10.1099/ijsem.0.004107
- 363



364 **Table 1.** Composition of the chemically defined medium.

| 365 | <b>Compound</b>                      | <b>Concentration</b> | <b>Units</b> | <b>Supplier</b> | <b>Part Number</b> | <b>Stock</b>             |
|-----|--------------------------------------|----------------------|--------------|-----------------|--------------------|--------------------------|
| 367 | <b>Base</b>                          |                      |              |                 |                    |                          |
| 368 | MOPS                                 | 40                   | mM           | Millipore       | 475898             | 10x in H <sub>2</sub> O  |
| 369 | K <sub>2</sub> HPO <sub>4</sub>      | 5                    | mM           | Fisher          | P288               | 10x in H <sub>2</sub> O  |
| 370 | NaCl                                 | 0.2                  | mM           | Fisher          | S271               | 100x in H <sub>2</sub> O |
| 371 | NH <sub>4</sub> Cl                   | 20                   | mM           | Fisher          | A649               | 100x in H <sub>2</sub> O |
| 372 | K <sub>2</sub> SO <sub>4</sub>       | 10                   | mM           | Sigma           | 746363             | 50x in H <sub>2</sub> O  |
| 373 | <b>Metal Salts</b>                   |                      |              |                 |                    |                          |
| 374 | MgCl <sub>2</sub> .6H <sub>2</sub> O | 1                    | mM           | Fisher          | BP214              | 100x in H <sub>2</sub> O |
| 375 | MnCl <sub>2</sub> .4H <sub>2</sub> O | 0.05                 | mM           | Sigma           | M3634              | 100x in H <sub>2</sub> O |
| 376 | FeSO <sub>4</sub> .7H <sub>2</sub> O | 0.05                 | mM           | Sigma           | F8633              | 100x in H <sub>2</sub> O |
| 377 | <b>Amino acids</b>                   |                      |              |                 |                    |                          |
| 378 | L-Alanine                            | 14                   | mM           | Sigma           | A7627              | 40x in H <sub>2</sub> O  |
| 379 | L-Arginine                           | 0.36                 | mM           | Sigma           | A5131              | 200x in H <sub>2</sub> O |
| 380 | Glycine                              | 3.41                 | mM           | Sigma           | G7126              | 200x in H <sub>2</sub> O |
| 381 | L-Lysine                             | 3.59                 | mM           | Sigma           | L5626              | 200x in H <sub>2</sub> O |
| 382 | L-Proline                            | 1.737                | mM           | Sigma           | P0380              | 200x in H <sub>2</sub> O |
| 383 | L-Histidine                          | 2.664                | mM           | Sigma           | H8125              | 200x in H <sub>2</sub> O |
| 384 | L-Serine                             | 7.374                | mM           | Sigma           | S4500              | 200x in H <sub>2</sub> O |
| 385 | L-Threonine                          | 2.098                | mM           | Sigma           | T8625              | 200x in H <sub>2</sub> O |
| 386 | L-Aspartic acid                      | 0.083                | mM           | Sigma           | A9256              | 200x in 1 M HCl          |
| 387 | L-Asparagine                         | 4.162                | mM           | Sigma           | A0884              | 200x in 1 M HCl          |
| 388 | L-Tyrosine                           | 1.1035               | mM           | Sigma           | T3754              | 200x in 1 M NaOH         |
| 389 | L-Cysteine-HCl                       | 4.758                | mM           | Sigma           | C1276              | 200x in H <sub>2</sub> O |
| 390 | L-Valine                             | 4.268                | mM           | Sigma           | V0500              | 200x in 1 M NaOH         |
| 391 | L-Glutamic acid                      | 1.417                | mM           | Sigma           | G1251              | 200x in 1 M HCl          |
| 392 | L-Tryptophane                        | 1.371                | mM           | Sigma           | T0254              | 200x in 1 M NaOH         |
| 393 | L-Phenylalanine                      | 1.513                | mM           | Sigma           | P2126              | 200x in 1 M HCl          |
| 394 | L-Glutamine                          | 3.267                | mM           | Sigma           | G3126              | 200x in 1 M NaOH         |
| 395 | L-Leucine                            | 1.905                | mM           | Sigma           | L8000              | 2000x in 0.5 M HCl       |
| 396 | L-Isoleucine                         | 1.905                | mM           | Sigma           | I2752              | 2000x in 0.5 M HCl       |
| 397 | L-Methionine                         | 0.67                 | mM           | Sigma           | M9625              | 200x in 0.1 M HCl        |
| 398 | <b>Nucleotides</b>                   |                      |              |                 |                    |                          |
| 399 | Guanine                              | 0.033                | mM           | Sigma           | G6779              | 200x in 0.1 M NaOH       |
| 400 | Uracil                               | 0.0445               | mM           | Sigma           | U1128              | 200x in 0.1 M NaOH       |
| 401 | Xanthine                             | 0.0325               | mM           | Sigma           | X4002              | 200x in 0.1 M NaOH       |
| 402 | Adenine                              | 0.037                | mM           | Sigma           | A2786              | 200x in 0.1 M HCl        |
| 403 | <b>Carbon</b>                        |                      |              |                 |                    |                          |
| 404 | Glucose                              | 1                    | %            | Sigma           | G8270              | 50x in H <sub>2</sub> O  |
| 405 | Fructose                             | 0.5 or 1             | %            | Sigma           | F3510              | 50x in H <sub>2</sub> O  |
| 406 | Acetate                              | 0.1                  | %            | Fisher          | S210               | 100x in H <sub>2</sub> O |
| 407 | <b>Optional</b>                      |                      |              |                 |                    |                          |
| 408 | Ascorbic acid                        | 1.4                  | mM           | Fisher          | AA3623714          | 100x in H <sub>2</sub> O |
| 409 | Lipoic acid                          | 1                    | mM           | Sigma           | T1395              | direct                   |
| 410 |                                      |                      |              |                 |                    |                          |
| 411 |                                      |                      |              |                 |                    |                          |
| 412 |                                      |                      |              |                 |                    |                          |

413 **Table 2. Composition of CDM\_L (for lactobacilli).**  
414

| 415 | <b>Stock Solution</b> | <b>Chemical</b>                       | <b>Final Concentration</b> |
|-----|-----------------------|---------------------------------------|----------------------------|
| 416 |                       |                                       | <b>buffer and salts</b>    |
| 417 | 1                     | MOPS                                  | 40 mM (1x)                 |
| 418 | 1                     | K <sub>2</sub> HPO <sub>4</sub>       | 5 mM (1x)                  |
| 419 | 1                     | NH <sub>4</sub> Cl                    | 20 mM (1x)                 |
| 420 | 1                     | Na <sub>2</sub> SO <sub>4</sub>       | 10 mM (1x)                 |
| 421 |                       |                                       |                            |
| 422 |                       | <b>metals</b>                         |                            |
| 423 | 2                     | MgCl <sub>2</sub> *6 H <sub>2</sub> O | 1 mM (1x)                  |
| 424 | 2                     | MnCl <sub>2</sub> *4 H <sub>2</sub> O | .05 mM (1x)                |
| 425 | 2                     | FeSO <sub>4</sub> *7 H <sub>2</sub> O | .05 mM (1x)                |
| 426 |                       |                                       |                            |
| 427 |                       | <b>carbon source</b>                  |                            |
| 428 | 3                     | glucose / mannitol                    | 125 mM (1x)                |
| 429 |                       |                                       |                            |
| 430 |                       | <b>Amino Acids</b>                    |                            |
| 431 | 4                     | Casamino AAs                          | 3 g/L                      |
| 432 |                       |                                       |                            |
| 433 | 5                     | Cysteine-HCl*H <sub>2</sub> O         | 1x (0.145 g/L)             |
| 434 |                       |                                       |                            |
| 435 | 6                     | Tryptophan                            | 1x (0.05 g/L)              |
| 436 |                       |                                       |                            |
| 437 | 7                     | <b>Wolfe's Vitamins</b>               | 2x (see composition below) |
| 438 |                       |                                       |                            |
| 439 | 8                     | <b>Wolfe's Minerals</b>               | 2x (see composition below) |

| 443 | <b>Wolfe's Vitamins (100x)</b>                       | <b>Concentration</b> | <b>units</b> | <b>Supplier</b> | <b>Part Number</b> | <b>Notes</b>  |
|-----|------------------------------------------------------|----------------------|--------------|-----------------|--------------------|---------------|
| 444 | Ca-(D)-(+)-pantothenate                              | 0.001                | g/L          | Sigma           | C8731              |               |
| 445 | Nicotinic acid                                       | 0.001                | g/L          | Sigma           | N4126              |               |
| 446 | Para-Aminobenzoic acid                               | 0.001                | g/L          | Nutr. Biochem.  | R-238              |               |
| 447 | Pyridoxine-HCl                                       | 0.002                | g/L          | Alfa aesar      | A12041             |               |
| 448 | Thiamine HCl                                         | 0.001                | g/L          | EMD Millipore   | 5871               |               |
| 449 | Biotin                                               | 0.0004               | g/L          | Sigma           | B4639              | in 0.1 M NaOH |
| 450 | Folic acid                                           | 0.0004               | g/L          | Sigma           | F8758              | in 0.1 M NaOH |
| 451 | Vitamin B <sub>12</sub>                              | 0.000002             | g/L          | TCI             | C0449              |               |
| 452 |                                                      |                      |              |                 |                    |               |
| 453 |                                                      |                      |              |                 |                    |               |
| 454 | <b>Wolfe's Minerals (100x)</b>                       |                      |              |                 |                    |               |
| 455 | Nitrilotriacetic Acid                                | 0.3                  | g/L          | Sigma           | N9877              |               |
| 456 | MgSO <sub>4</sub> -7H <sub>2</sub> O                 | 0.6                  | g/L          | EMD Millipore   | MX0070-1           |               |
| 457 | MnSO <sub>4</sub> -H <sub>2</sub> O                  | 0.1                  | g/L          | Fisher          | M113               |               |
| 458 | NaCl                                                 | 0.2                  | g/L          | Fisher          | S271               |               |
| 459 | CaCl <sub>2</sub>                                    | 0.02                 | g/L          | Mallinckrodt    | 4160               |               |
| 460 | FeSO <sub>4</sub> -7H <sub>2</sub> O                 | 0.02                 | g/L          | Sigma           | F8633              |               |
| 461 | CoCl <sub>2</sub> -6 H <sub>2</sub> O                | 0.02                 | g/L          | Sigma           | 202185             |               |
| 462 | ZnSO <sub>4</sub> -7 H <sub>2</sub> O                | 0.02                 | g/L          | Fisher          | Z68                |               |
| 463 | CuSO <sub>4</sub> -5 H <sub>2</sub> O                | 0.002                | g/L          | VWR             | 330                |               |
| 464 | AlK(SO) <sub>4</sub> -12 H <sub>2</sub> O            | 0.002                | g/L          | Sigma           | 237086             |               |
| 465 | H <sub>3</sub> BO <sub>3</sub>                       | 0.002                | g/L          | Fisher          | A78                |               |
| 466 | Na <sub>2</sub> MoO <sub>4</sub> -2 H <sub>2</sub> O | 0.002                | g/L          | Acros Organics  | 446360250          |               |
| 467 |                                                      |                      |              |                 |                    |               |
| 468 |                                                      |                      |              |                 |                    |               |

469

470 **Table 3. Composition of CDM\_A (for *Acetobacters*).**

471

472 **Reagent** **Concentration** **Supplier** **Part Number**

473 **Base**

474 MOPS 40 0.837 8.37 (pH 6.8) 40 mM (Millipore) 475898

475 K<sub>2</sub>HPO<sub>4</sub> 5 mM (Fisher) P288

476 NH<sub>4</sub>Cl 18.69 0.1 10 20 mM (Fisher) A649

477 K<sub>2</sub>SO<sub>4</sub> 8.28 0.144 7.2 10 mM (Sigma) 746363

478 **Metal Salts**

479 MgCl<sub>2</sub>·6H<sub>2</sub>O 0.98 0.02 2 1 mM (Fisher) BP214

480 MnCl<sub>2</sub>·4H<sub>2</sub>O 0.05 0.001 0.1 0.05 mM (Sigma) M3634

481 FeSO<sub>4</sub>·7H<sub>2</sub>O 0.035 0.001 0.1 0.05 mM (Sigma) F8633

482 **Carbon Sources**

483 Glucose 125 mM (Sigma) G8270

484 Potassium Acetate 6 mM (Fisher) P171

485 DL-Lactic Acid 50 mM (Sigma) 69785

486 **Amino acids**

487 Casamino Acids 6 g/L BD Bacto 223050

488 L-Cysteine HCL 0.58 g/L Sigma C1276

489 L-Tryptophan 0.2 g/L Sigma T0254

490 **Wolfe's vitamins 1x**

491 **Wolfe's minerals 1x**

492

493 Figure S1.

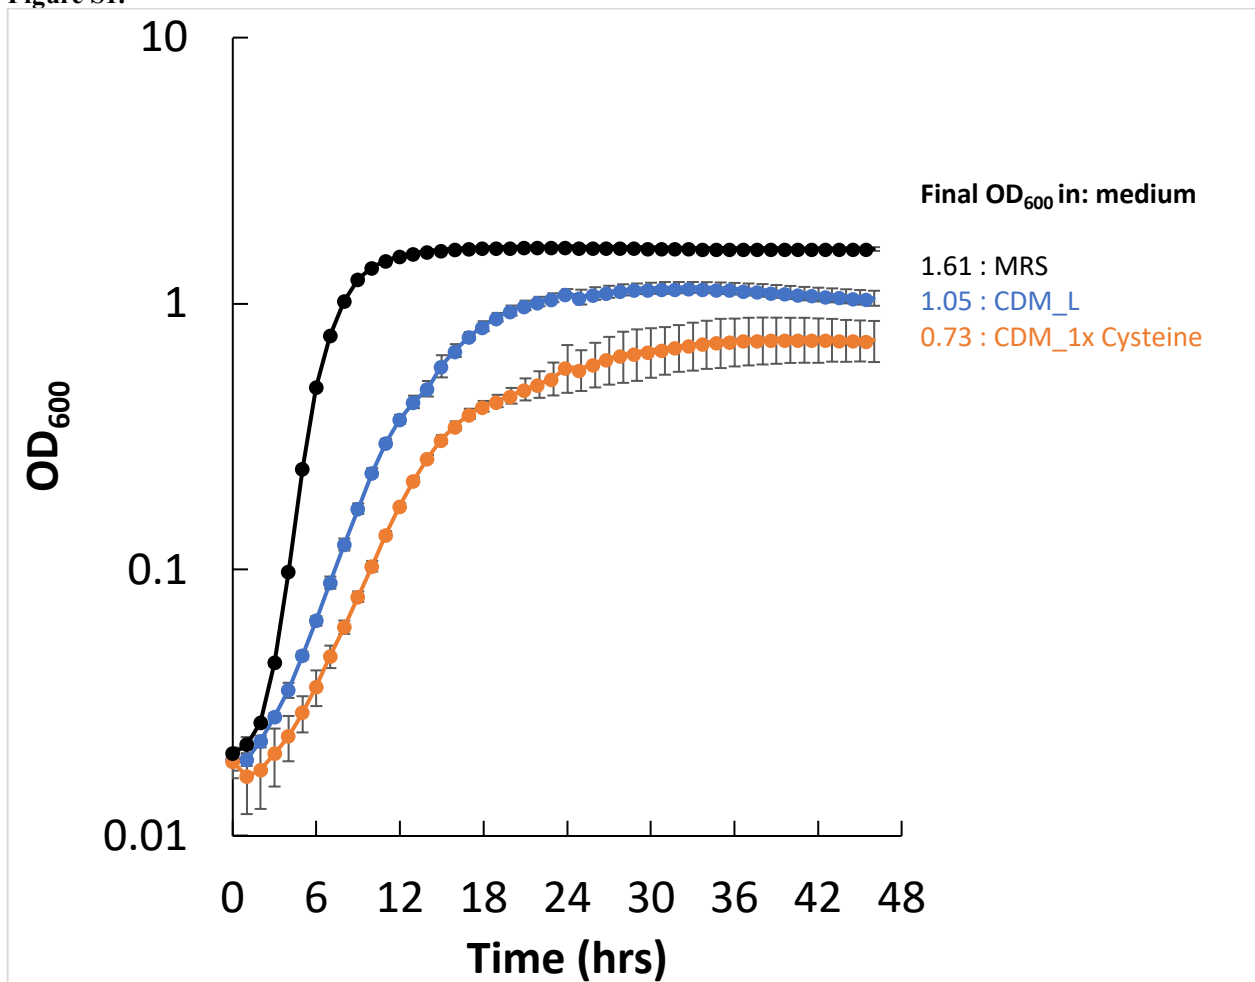

494 Growth of *Lp. plantarum* NCIMB8826 in MRS, CDM\_L, and a CDM without added cysteine. Inoculation at  
495 0.05 from overnight cultures of MRS grown cells washed in PBS. Growth in 96 well plates with 12 technical  
496 replicates per growth curve. Note that CDM\_L has 10x the cysteine of CDM\_1x Cysteine.  
497  
498  
499

500 **Table S1.**

501 Bacterial strains used in this study.

| 502 | <b>Species</b>                  | <b>Source</b>                                 | <b>Reference</b>     |
|-----|---------------------------------|-----------------------------------------------|----------------------|
| 503 | <i>Lp. plantarum</i> WF         | Wild <i>D. melanogaster</i> isolate           | Obadia et al. 2017   |
| 504 | <i>Lp. plantarum</i> NC8        | Fermented grass                               | Axelsson et al. 2012 |
| 505 | <i>Lp. plantarum</i> NCIMB8826  | Human saliva                                  | Hayward & Davis 1956 |
| 506 | <i>Lp. plantarum</i> LF         | Canton-S <i>D. melanogaster</i>               | Obadia et al. 2017   |
| 507 | <i>Lp. plantarum</i> endoref    | lab <i>D. melanogaster</i>                    | Storelli et al. 2011 |
| 508 | <i>Lp. plantarum</i> SB001      | lab <i>D. melanogaster</i>                    | Obadia et al. 2017   |
| 509 | <i>Lp. plantarum</i> SSB        | wild <i>D. melanogaster</i>                   | Hardy et al. 2018    |
| 510 | <i>Lp. plantarum</i> WJL        | lab <i>D. melanogaster</i>                    | Ryu et al 2008       |
| 511 | <i>Lp. plantarum</i> K4         | wheat sourdough starter                       | Yu et al 2021        |
| 512 | <i>Lp. plantarum</i> 8.1        | wheat boza                                    | Yu et al 2021        |
| 513 | <i>Lp. plantarum</i> W1.1       | wheat flour teff injera                       | Yu et al 2021        |
| 514 | <i>Lp. plantarum</i> B1.1       | brown flour teff injera                       | Yu et al 2021        |
| 515 | <i>Lp. plantarum</i> B1.3       | brown flour teff injera                       | Yu et al 2021        |
| 516 | <i>Lp. plantarum</i> T2.5       | fermented tomatoes                            | Yu et al 2021        |
| 517 | <i>Lp. plantarum</i> WS1.1      | fermented tomatoes (spoiled)                  | Yu et al 2021        |
| 518 | <i>Lp. plantarum</i> 1B1        | cactus fruit ( <i>Opuntia ficus-indicia</i> ) | Tyler et al 2016     |
| 519 | <i>Lp. plantarum</i> AJ11       | fermented olives                              | Golomb et al 2013    |
| 520 | <i>Lp. plantarum</i> BGM55      | fermented olives inoculated with yeast        | Golomb et al 2013    |
| 521 | <i>Lp. plantarum</i> BGM37      | olive fermentation brine                      | Golomb et al 2013    |
| 522 | <i>Lp. plantarum</i> BGM40      | fermented olives                              | Golomb et al 2013    |
| 523 | <i>Lp. plantarum</i> EL11       | fermented olives                              | Golomb et al 2013    |
| 524 | <i>Ll. brevis</i> LF            | isolated from lab <i>D. melanogaster</i>      | Gould et al. 2018    |
| 525 | <i>Ll. brevis</i> LF2           | isolated from lab <i>D. melanogaster</i>      | Obadia et al. 2017   |
| 526 | <i>Ll. brevis</i> SSA           | isolated from wild <i>D. melanogaster</i>     | Hardy et al. 2018    |
| 527 | <i>Ll. brevis</i> Di            | isolated from wild <i>D. immigrans</i>        | this paper           |
| 528 | <i>Acetobacter orientalis</i>   | Canton-S isolate                              | Gould et al. 2018    |
| 529 | <i>Acetobacter pasteurianus</i> | Oregon-R isolate                              | Gould et al. 2018    |
| 530 | <i>Acetobacter tropicalis</i>   | Oregon-R isolate                              | Gould et al. 2018    |

531

532

533

534 **Table S2.**

535 Initial growth yield values of strains grown in CDM (Savijoki et al., 2006) with indicated carbon sources. Glu  
536 (Glucose), Fru (Fructose), Ac (Acetate), LP (*Lactobacillus plantarum*), (LB) *L. brevis*, (AP) *Acetobacter*  
537 *pasteurianus*, (AT) *A. tropicalis*.

538

539

|     |    | <b>Final growth yield (OD<sub>595</sub>)</b> |              |            |           |           |           |
|-----|----|----------------------------------------------|--------------|------------|-----------|-----------|-----------|
|     |    | Glu (0.65 %)                                 | Glu (0.65 %) | Glu (1 %)  | Fru (1 %) | Glu (1 %) | Ac (0.1%) |
|     |    | Fru (0.65 %)                                 | Fru (0.65 %) | Ac (0.1 %) |           |           |           |
|     |    | Ac (0.1 %)                                   |              |            |           |           |           |
| 540 | LP |                                              |              | 0.123      |           | 0.056     | 0.001     |
| 541 | LB | 0.051                                        | 0.026        |            |           |           | 0         |
| 542 | AP |                                              |              |            | 0.026     |           | 0.014     |
| 543 | AT |                                              |              | 0.021      |           | 0.044     | 0.021     |

544

545

546

547 **Table S3.**

548 Variations in CDM and final growth yields of strains. CDM single variations with one component in 10-fold excess.  
 549 The final growth yield was compared to the final growth yield of the same strains grown in CDM with the final  
 550 concentration of amino acids, vitamins, nucleotides indicated in Table 1. ODs >0.3 are highlighted. S.E.M. in  
 551 parentheses.  
 552

|     |                        | Final growth yield (OD <sub>595</sub> ) |                  |                 |                 |
|-----|------------------------|-----------------------------------------|------------------|-----------------|-----------------|
|     |                        | LP                                      | LB               | AP              | AT              |
| 554 | CDM (Table 1)          | 0.238 (m 0.002)                         | 0.131 (m 0.001)  | 0.103 (m 0.020) | 0.036 (m 0.001) |
| 555 |                        |                                         |                  |                 |                 |
| 556 | CDM single variations  |                                         |                  |                 |                 |
| 557 |                        |                                         |                  |                 |                 |
| 558 | Ala                    | 0.218 (m 0.009)                         | 0.138 (m 0.000)  | 0.199 (m 0.000) | 0.073 (m 0.007) |
| 559 | Asn                    | 0.229 (m 0.019)                         | 0.132 (m 0.005)  | 0.136 (m 0.112) | 0.037 (m 0.006) |
| 560 | Glu                    | 0.317 (m 0.011)                         | 0.071 (m 0.006)  | 0.030 (m 0.004) | 0.049 (m 0.002) |
| 561 | Phe                    | 0.285 (m 0.033)                         | 0.134 (m 0.002)  | 0.062 (m 0.040) | 0.034 (m 0.003) |
| 562 | Leu                    | 0.269 (m 0.109)                         | 0.130 (m 0.002)  | 0.025 (m 0.003) | 0.047 (m 0.004) |
| 563 | Ile                    | 0.228 (m 0.001)                         | 0.135 (m 0.011)  | 0.064 (m 0.023) | 0.036 (m 0.005) |
| 564 | Met                    | 0.231 (m 0.002)                         | 0.123 (m 0.000)  | 0.024 (m 0.041) | 0.040 (m 0.001) |
| 565 | Val                    | 0.251 (m 0.044)                         | 0.138 (m 0.001)  | 0.032 (m 0.003) | 0.004 (m 0.001) |
| 566 | Trp                    | 0.877 (m 0.535)                         | 0.127 (m 0.004)  | 0.128 (m 0.059) | 0.036 (m 0.003) |
| 567 | Gln                    | 0.287 (m 0.007)                         | 0.076 (m 0.003)  | 0.000 (m 0.002) | 0.039 (m 0.000) |
| 568 | Arg                    | 0.118 (m 0.030)                         | 0.124 (m 0.000)  | 0.085 (m 0.021) | 0.033 (m 0.002) |
| 569 | Gly                    | 0.217 (m 0.005)                         | 0.133 (m 0.000)  | 0.156 (m 0.040) | 0.034 (m 0.000) |
| 570 | Lys                    | 0.213 (m 0.000)                         | 0.141 (m 0.001)  | 0.099 (m 0.013) | 0.041 (m 0.000) |
| 571 | Pro                    | 0.298 (m 0.016)                         | 0.155 (m 0.002)  | 0.058 (m 0.020) | 0.037 (m 0.000) |
| 572 | His                    | 0.268 (m 0.019)                         | 0.138 (m 0.003)  | 0.118 (m 0.083) | 0.040 (m 0.000) |
| 573 | Ser                    | 0.296 (m 0.008)                         | 0.121 (m 0.007)  | 0.054 (m 0.002) | 0.065 (m 0.032) |
| 574 | Thr                    | 0.257 (m 0.025)                         | 0.140 (m 0.002)  | 0.046 (m 0.011) | 0.032 (m 0.001) |
| 575 | Panθοthenate           | 0.246 (m 0.011)                         | 0.138 (m 0.002)  | 0.055 (m 0.027) | 0.027 (m 0.009) |
| 576 | Lipoic acid            | 0.260 (m 0.010)                         | 0.111 (m 0.004)  | 0.032 (m 0.005) | 0.033 (m 0.000) |
| 577 | Cyanocobalamin         | 0.261 (m 0.005)                         | 0.136 (m 0.000)  | 0.088 (m 0.000) | 0.045 (m 0.003) |
| 578 | Nicotinic acid         | 0.218 (m 0.007)                         | 0.151 (m 0.027)  | 0.074 (m 0.002) | 0.039 (m 0.001) |
| 579 | para-Aminobenzoic acid | 0.217 (m 0.010)                         | 0.155 (m 0.028)  | 0.137 (m 0.065) | 0.038 (m 0.004) |
| 580 | Pyridoxine             | 0.225 (m 0.000)                         | 0.135 (m 0.001)  | 0.067 (m 0.007) | 0.038 (m 0.004) |
| 581 | Thiamine               | 0.231 (m 0.012)                         | 0.136 (m 0.001)  | 0.143 (m 0.051) | 0.037 (m 0.000) |
| 582 | Biotin                 | 0.299 (m 0.009)                         | 0.137 (m 0.005)  | 0.075 (m 0.002) | 0.041 (m 0.000) |
| 583 | Ascorbate              | 0.231 (m 0.007)                         | 0.088 (m 0.052)  | 0.316 (m 0.370) | 0.050 (m 0.000) |
| 584 | Folate                 | 0.227 (m 0.010)                         | 0.139 (m 0.001)  | 0.071 (m 0.009) | 0.041 (m 0.000) |
| 585 | Riboflavin             | 0.230 (m 0.012)                         | 0.135 (m 0.000)  | 0.187 (m 0.013) | 0.037 (m 0.001) |
| 586 | Guanine                | 0.212 (m 0.004)                         | 0.136 (m 0.000)  | 0.124 (m 0.035) | 0.042 (m 0.005) |
| 587 | Uracil                 | 0.267 (m 0.000)                         | 0.155 (m 0.004)  | 0.066 (m 0.019) | 0.043 (m 0.003) |
| 588 | Xanthine               | 0.243 (m 0.007)                         | 0.138 (m 0.002)  | 0.069 (m 0.018) | 0.040 (m 0.003) |
| 589 | Adenine                | 0.252 (m 0.007)                         | 0.133 (m 0.001)  | 0.055 (m 0.033) | 0.044 (m 0.002) |
| 590 | PO <sub>4</sub>        | 0.263 (m 0.008)                         | 0.208 (m 0.000)  | 0.042 (m 0.018) | 0.037 (m 0.002) |
| 591 | SO <sub>4</sub>        | 0.276 (m 0.074)                         | 0.132 (m 0.000)  | 0.120 (m 0.081) | 0.042 (m 0.001) |
| 592 | NH <sub>4</sub>        | 0.200 (m 0.004)                         | 0.159 (m 0.002)  | 0.040 (m 0.017) | 0.036 (m 0.003) |
| 593 | Mg                     | 0.205 (m 0.092)                         | 0.154 (m 0.039)  | 0.060 (m 0.003) | 0.039 (m 0.002) |
| 594 | Mn                     | 0.290 (m 0.008)                         | 0.157 (m 0.003)  | 0.113 (m 0.029) | 0.057 (m 0.020) |
| 595 | Fe                     | 0.210 (m 0.007)                         | 0.157 (m 0.001)  | 0.120 (m 0.029) | 0.042 (m 0.001) |
| 596 | Na                     | 0.177 (m 0.032)                         | 0.139 (m 0.001)  | 0.164 (m 0.085) | 0.018 (m 0.000) |
| 597 | Bicarbonate, 40 mM     | 0.347 (m 0.019)                         | 0.0135 (m 0.001) | 0.022 (m 0.004) | 0.038 (m 0.000) |
| 598 |                        |                                         |                  |                 |                 |

599  
600  
601  
602  
603  
604  
605  
606  
607

**Table S4.**

Final growth yield values of strains grown in CDM with indicated fold-difference of the combined amino acids, vitamins, and nucleotides from the concentration of components listed in Table 1, which is set to 1x. LP (*Lactobacillus plantarum*), (LB) *L. brevis*, (AP) *Acetobacter pasteurianus*, (AT) *A. tropicalis*. S.E.M. in parentheses.

608  
609  
610  
611  
612  
613  
614  
615  
616

| Fold excess | Final growth yield |                 |                 |                 |
|-------------|--------------------|-----------------|-----------------|-----------------|
|             | LP                 | LB              | AP              | AT              |
| 2 x         | 0.449 (m 0.029)    | 0.06 (m 0.005)  | 0.101 (m 0.078) | 0.072 (m 0.005) |
| 1 x         | 0.236 (m 0.016)    | 0.058 (m 0.002) | 0.151 (m 0.014) | 0.096 (m 0.001) |
| 0.2 x       | 0.085 (m 0.009)    | 0.031 (m 0.001) | 0.103 (m 0.004) | 0.093 (m 0.004) |



617 **Table S5.**  
618 List of chemicals used in this study.  
619

| 620 | <b>Chemical</b>                      | <b>Vendor</b>     | <b>Catalog number</b> | <b>Molecular Weight</b> |
|-----|--------------------------------------|-------------------|-----------------------|-------------------------|
| 621 | MOPS, Free acid, UltraPure           | GoldBio           | M790                  | 209.26                  |
| 622 | K <sub>2</sub> HPO <sub>4</sub>      | Fisher Scientific | P288                  | 174.18                  |
| 623 | NaCl                                 | Fisher Scientific | S271                  | 58.44                   |
| 624 | NH <sub>4</sub> Cl                   | Fisher Scientific | A649                  | 53.49                   |
| 625 | K <sub>2</sub> SO <sub>4</sub>       | Sigma             | P9458                 | 174.26                  |
| 626 | MgCl <sub>2</sub> ·6H <sub>2</sub> O | Fisher Scientific | BP214                 | 203.31                  |
| 627 | MnCl <sub>2</sub> ·4H <sub>2</sub> O | Sigma             | M3634                 | 197.9                   |
| 628 | FeSO <sub>4</sub> ·7H <sub>2</sub> O | Sigma             | F8633                 | 278.01                  |
| 629 | L-Alanine                            | Sigma             | A7627                 | 89.09                   |
| 630 | L-Arginine                           | Sigma             | A5131                 | 210.66                  |
| 631 | Glycine                              | Sigma             | G7126                 | 75.07                   |
| 632 | L-Lysine                             | Sigma             | L5626                 | 146.19                  |
| 633 | L-Proline                            | Sigma             | P0380                 | 115.13                  |
| 634 | L-Histidine                          | Sigma             | H8125                 | 155.15                  |
| 635 | L-Serine                             | Sigma             | S4500                 | 105.09                  |
| 636 | L-Threonine                          | Sigma             | T8625                 | 119.12                  |
| 637 | L-Aspartic acid                      | Sigma             | A9256                 | 133.1                   |
| 638 | L-Asparagine                         | Sigma             | A0884                 | 132.12                  |
| 639 | L-Tyrosine                           | Sigma             | T3754                 | 181.19                  |
| 640 | L-Cysteine-HCl                       | Sigma             | C1276                 | 157.62                  |
| 641 | L-Valine                             | Sigma             | V0500                 | 117.15                  |
| 642 | L-Glutamic acid                      | Sigma             | G1251                 | 183.6                   |
| 643 | L-Tryptophane                        | Sigma             | T0254                 | 204.23                  |
| 644 | L-Phenylalanine                      | Sigma             | P2126                 | 165.19                  |
| 645 | L-Glutamine                          | Sigma             | G3126                 | 146.14                  |
| 646 | L-Leucine                            | Sigma             | L8000                 | 131.17                  |
| 647 | L-Isoleucine                         | Sigma             | I2752                 | 131.17                  |
| 648 | L-Methionine                         | Sigma             | M9625                 | 149.21                  |
| 649 | Ca-(D)-(+)-pantothenate              | Sigma             | C8731                 | 238.27                  |
| 650 | Lipoic acid                          | Sigma             | T1395                 | 206.33                  |
| 651 | Nicotinic acid                       | Sigma             | 72309                 | 123.11                  |
| 652 | Para-Aminobenzoic acid               | Sigma             | A9878                 | 137.14                  |
| 653 | Pyridoxine-HCl                       | Sigma             | P9755                 | 205.64                  |
| 654 | Thiamine-HCl                         | Sigma             | T4625                 | 337.27                  |
| 655 | Biotin                               | Sigma             | B4639                 | 244.31                  |
| 656 | Ascorbic acid                        | Fisher Scientific | AA3623714             | 176.12                  |
| 657 | Folic acid                           | Sigma             | F7876                 | 441.4                   |
| 658 | Riboflavin                           | Sigma             | R4500                 | 376.36                  |
| 659 | Cyanocobalamin                       | Sigma             | V6629                 | 1355.37                 |
| 660 | Guanine                              | Sigma             | G6779                 | 151.13                  |
| 661 | Uracil                               | Sigma             | U1128                 | 112.09                  |
| 662 | Xanthine                             | Sigma             | X4002                 | 152.11                  |
| 663 | Adenine                              | Sigma             | A2786                 | 135.13                  |
| 664 | Glucose                              | Sigma             | G8270                 | 180.16                  |
| 665 | Fructose                             | Sigma             | F3510                 | 180.16                  |
| 666 | Acetate, sodium salt                 | Fisher Scientific | S210                  | 90.08                   |

667  
668
